# Supplementary material for: Alternating constructions with ditransitivegebenin present-day German
Source: publisher site journal article supplement (doi:10.1515/cllt-2017-0072), 2018-05-25
Supplement: Supplementary file 1 [file Supplement 1.pdf › Supplement 1.pdf]

## Supplement 1: Origin of the example sentences

- (1) Wir müssen den Jungs Zeit geben. (**Mannheimer Morgen, 11.07.2008**)
- (2) Meine Lebensgefährtin gab mir eine Notspritze. (**Rhein-Zeitung, 19.10.2002**)
- (3) Striffler hat sein Werk an das Archiv des Deutschen Architekturmuseums in Frankfurt gegeben. (**Mannheimer Morgen, 01.02.2012**)
- (4) Welche Empfehlungen gibt der VGT an den Gesetzgeber? (**Nürnberger Zeitung, 29.01.2011**)
- (5) a. 1966 übergaben ihre Erben die Sammlung der Nationalgalerie. (**St. Galler Tagblatt, 26.01.1998**)  
b. “Aber ich übergebe an meinen Nachfolger eine intakte Mannschaft”, so Knapp. (**Mannheimer Morgen, 19.06.2001**)
- (6) a. Die Polizei fand die Beute und gab sie dem 36-jährigen Eigentümer zurück. (**Nürnberger Nachrichten, 13.04.2012**)  
b. Die Schule habe die vakante Stelle deshalb an das Ministerium zurückgegeben. (**Braunschweiger Zeitung, 01.06.2012**)
- (7) Kronauer will eine Liste mit allen Teilnehmern an die Stadt geben. (**Mannheimer Morgen, 23.03.2012**)
- (8) Über Mikro und Kopfhörer gibt die Diplom-Psychologin Anweisungen an den Studenten. (**Frankfurter Rundschau, 23.05.1998**)
- (9) Landwirte müssen schon jetzt häufig ihren Vorrat an Winterfutter an die Tiere geben. (**Berliner Morgenpost, 14.09.1999**)
- (10) NA
- (11) NA
- (12) NA
- (13) Der Kassierer gab dem Räuber das Geld aus der Kasse. (**Mannheimer Morgen, 10.11.2006**)
- (14) Leider muss sie das schwarze Pulver an den Bösewicht geben. (**Rhein-Zeitung, 24.12.1996**)
- (15) Ausgewählte Aktivangebote geben dem Reisenden die Möglichkeit, das Urlaubsziel auf eigenen Wegen zu erkunden. (**Nürnberger Nachrichten, 15.09.2012**)
- (16) Der Aufsichtsrat stimmte grundsätzlich dem Konzept zu, die Gastronomie des Hauses exklusiv an eine einzige Firma zu geben. (**Frankfurter Rundschau, 18.03.1998**)
- (17) Dünnebier hat seine Vorschläge bereits an das Planungsbüro gegeben, das den Lampertheimer Verkehrsentwicklungsplan aufstellt. (**Mannheimer Morgen, 28.02.1998**)
- (18) Man wollte den Anhängern die Möglichkeit geben, die Einrichtung des Lokals mitzugestalten. (**Neue Zürcher Zeitung, 21.05.2012**)
- (19) Er gab den Auftrag an eine Gießerei, den Nachguss anzufertigen. (**Braunschweiger Zeitung, 10.12.2009**)
- (20) Bei dem Song “The Girl From Ipanema” gab Gitarrist Hugo Fuchs an das Publikum die Empfehlung: “Stellen Sie sich vor, Sie wären in der Karibik am Strand mit einem kühlen Cocktail in der Hand”. (**Mannheimer Morgen, 16.06.2005**)

- (21) Die Waffe war dem Buben von den Eltern gegeben worden, um seine drei Brüder zu schützen. **(Die Presse, 22.07.1994)**
- (22) Schuld geben die Wissenschaftler der Beschleunigung unseres Lebens im digitalen Zeitalter. **(Nürnberger Zeitung, 03.05.2007)**
- (23) Die Frau packte 215 Euro in eine Tüte und gab sie dem Mann. **(Hamburger Morgenpost, 08.03.2007)**
- (24) Niemals wird das Geld an die Familien geben, sondern immer an die zuständigen Stellen. **(Rhein-Zeitung, 04.11.2006)**
- (25) Die Stadt Wolfsburg will das Grundstück an einen Privatinvestor geben, der dort 23 Wohnungen in Stadtvillen bauen will. **(Braunschweiger Zeitung, 29.09.2012)**
- (26) Der gab auch gleich seinen ersten Befehl an das Volk. **(Rhein-Zeitung, 13.01.1997)**
- (27) Der Besuch in Schweden hat ihm Auftrieb und Energie gegeben, dranzubleiben. **(St. Galler Tagblatt, 04.10.1997)**
- (28) Und abermals gaben die Sorgen um die weitere wirtschaftliche Entwicklung in Europa der Stimmung einen Dämpfer. **(Nürnberger Nachrichten, 15.05.2012)**
