# Supplementary material for: Alternating constructions with ditransitivegebenin present-day German
Source: publisher site journal article supplement (doi:10.1515/cllt-2017-0072), 2018-05-25
Supplement: Supplementary file 2 [file Supplement 2.pdf › Supplement 2.pdf]

## Supplement 2: Sentence patterns with *geben* in present-day German and their frequencies

Sentence patterns with IOC. (Note: Because the analysis bears on ditransitive *geben*, monotransitive uses were excluded from the dataset.)

| Cx and Word Order | Sentence pattern           | N          | Example                                                                                                                                                                                                                                                                                                                                                                                                                                          |
|-------------------|----------------------------|------------|--------------------------------------------------------------------------------------------------------------------------------------------------------------------------------------------------------------------------------------------------------------------------------------------------------------------------------------------------------------------------------------------------------------------------------------------------|
| IOC REC-THEME     | SUBJECT – V – IO – DO      | 243        | Deutsche Eltern geben <ihren Kindern> immer häufiger [biblische Namen]. ( <b>Neue Kronen-Zeitung</b> , 25.02.1996)                                                                                                                                                                                                                                                                                                                               |
|                   | SUBJECT – IO – DO – V      | 247        | Der Erfolg wird <der deutschen Liga> [einen Riesen-Aufschwung] geben. ( <b>Mannheimer Morgen</b> , 06.02.2007)<br>Und weiß, wie dieses Detail, an der richtigen Stelle platziert, <einer Geschichte> [den entscheidenden Dreh] geben kann. ( <b>Hannoversche Allgemeine</b> , 18.12.2007)<br>Damit wollte die Regierung <der angeschlagenen heimischen Stahlindustrie> [Zeit zur Konsolidierung] geben. ( <b>Mannheimer Morgen</b> , 06.12.2003) |
|                   | V – SUBJECT – IO – DO      | 52         | Im Laufe der Auseinandersetzung gab er <dem Mannheimer> [einen Kopfstoß] wobei dieser sich einen Nasenbeinbruch zuzog. ( <b>Mannheimer Morgen</b> , 19.01.2011)                                                                                                                                                                                                                                                                                  |
|                   | V – IO – SUBJECT – DO      | 2          | Wenn Sie heute Kirchen ausmalen, geben <Ihnen> dann die Gemeinden [Vorgaben]? ( <b>Rhein-Zeitung</b> , 03.04.1999)                                                                                                                                                                                                                                                                                                                               |
|                   | IO – V – SUBJECT – DO      | 4          | <Einem entsprechenden Gesetz> gab der Bundesrat gestern ebenfalls [seine Zustimmung]. ( <b>Mannheimer Morgen</b> , 21.12.1985)                                                                                                                                                                                                                                                                                                                   |
|                   | IO – SUBJECT – DO – V      | 7          | <Ihren Angehörigen> konnte sie mit einem Brief vom 23. April 1943 [ein letztes Lebenszeichen] geben. ( <b>Frankfurter Rundschau</b> , 12.03.1998)                                                                                                                                                                                                                                                                                                |
|                   | Zero subject – IO – DO – V | 69         | Das Komitee tritt auch dafür ein, <dem Parlament> [mehr Macht] zu geben. ( <b>Die Presse</b> , 17.02.1993)                                                                                                                                                                                                                                                                                                                                       |
|                   | V – IO – DO                | 7          | Gib <mir> [die Brieftasche]! ( <b>Neue Kronen-Zeitung</b> , 09.06.1996)                                                                                                                                                                                                                                                                                                                                                                          |
|                   | IO – DO – V (passive)      | 49         | Hier wird <den Schülern> [die Gelegenheit] gegeben, [[mit Zeitzeugen zu diskutieren]]. ( <b>Mannheimer Morgen</b> , 04.05.2004)                                                                                                                                                                                                                                                                                                                  |
|                   |                            | <b>680</b> |                                                                                                                                                                                                                                                                                                                                                                                                                                                  |
| IOC THEME-REC     | SUBJECT – V – DO – IO      | 7          | Der Direktor der Nahrungs- und Landwirtschaftsorganisation der Uno (FAO) hatte tags zuvor in Paris [die Schuld an der Krise] <einer verfehlten Politik in den vergangenen 20 Jahren> gegeben. ( <b>Neue Zürcher Zeitung</b> , 25.04.2008)                                                                                                                                                                                                        |
|                   | SUBJECT – DO – IO – V      | 3          | Allein in Neef haben wir 15 Prozent verloren, weil die Wähler [ihre Stimmen] lieber <den Liberalen> gaben. ( <b>Rhein-Zeitung</b> , 25.03.1996)                                                                                                                                                                                                                                                                                                  |
|                   | V – SUBJECT – DO – IO      | 2          | Den Erlös wollten wir spenden, und da in Holzheim aktuell nichts anstand, geben wir [das Geld] nun <dem Kindergarten>", erzählt Björn Fetter. ( <b>Rhein-Zeitung</b> , 08.12.2005)                                                                                                                                                                                                                                                               |

|  |                       |           |                                                                                                                                                                            |
|--|-----------------------|-----------|----------------------------------------------------------------------------------------------------------------------------------------------------------------------------|
|  | DO – V – SUBJECT – IO | 6         | [Schuld] geben die Wissenschaftler <der Beschleunigung unseres Lebens im digitalen Zeitalter>. ( <b>Nürnberger Zeitung, 03.05.2007</b> )                                   |
|  | DO – IO – SUBJECT – V | 1         | [Ihr Interesse für Mode], so Annkathrin Bauhofer, habe <ihr> die Mutter mit auf den Weg gegeben. ( <b>Neue Zürcher Zeitung, 02.02.2013</b> )                               |
|  | DO – SUBJECT – IO – V | 5         | [Das Mobiltelefon] soll die 16-Jährige <dem Angeklagten> gegeben haben, der das Handy weiterverkaufen sollte. ( <b>Braunschweiger Zeitung, 06.02.2013</b> )                |
|  | DO – V – IO – SUBJECT | 4         | [Seinen Namen] gaben <ihm> die Beginen, eine Gemeinschaft alleinstehender Frauen, die fromm, sittsam und bescheiden lebten. ( <b>Hannoversche Allgemeine, 03.11.2012</b> ) |
|  | DO – IO – V (passive) | 4         | [Die Waffe] war <dem Buben> von den Eltern gegeben worden, um seine drei Brüder zu schützen. ( <b>Die Presse, 22.07.1994</b> )                                             |
|  | <b>TOTAL:</b>         | <b>32</b> |                                                                                                                                                                            |

Sentence patterns with POC

| Cx and Word Order | Sentence pattern      | N        | Example                                                                                                                                                                                                                                                                                                                                                                   |
|-------------------|-----------------------|----------|---------------------------------------------------------------------------------------------------------------------------------------------------------------------------------------------------------------------------------------------------------------------------------------------------------------------------------------------------------------------------|
| POC REC-THEME     | V – SUBJECT – IO – DO | 1        | Bei dem Song "The Girl From Ipanema" gab Gitarrist Hugo Fuchs <an das Publikum> [die Empfehlung: "Stellen Sie sich vor, Sie wären in der Karibik am Strand mit einem kühlen Cocktail in der Hand"]. ( <b>Mannheimer Morgen, 16.06.2005</b> )                                                                                                                              |
|                   | <b>TOTAL:</b>         | <b>1</b> |                                                                                                                                                                                                                                                                                                                                                                           |
| POC THEME-REC     | SUBJECT – V – DO – IO | 58       | Zwei mit dem Schrittmacher verbundene Elektroden gaben damals [Stimulationsenergie] <an das völlig aus dem Takt geratene Herz eines Mannes, der in einer Not-OP unters Messer gekommen war>. ( <b>Mannheimer Morgen, 13.04.2012</b> )                                                                                                                                     |
|                   | SUBJECT – DO – IO – V | 243      | Auch die EU-Staaten mit Ausnahme Griechenlands wollen [keine Wiederaufbauhilfe] <an das Serbien von Milosevic> geben. ( <b>Kleine Zeitung, 02.07.1999</b> )<br>Trotz schwieriger Haushaltslage haben wir im Haushaltsausschuss [ein wichtiges Signal] <an das Technische Hilfswerk (THW) und seine ehrenamtlichen Helfer> gegeben. ( <b>Kleine Zeitung, 02.07.1999,</b> ) |
|                   | SUBJECT – DO – IO – V | 108      | Ärzte sind ja oft froh und erleichtert, wenn sie [bestimmte Patienten] <an den Heilpraktiker> geben können. ( <b>Wikipedia, 2011</b> )                                                                                                                                                                                                                                    |
|                   | V – SUBJECT – DO – IO | 24       | Einmal gab er [seinen ganzen Monatslohn] <an das Schulgeld>. ( <b>St. Galler Tagblatt, 14.05.2009</b> )                                                                                                                                                                                                                                                                   |
|                   | DO – V – SUBJECT – IO | 8        | [So etwas] geben wir dann <an das Bundeskriminalamt>. ( <b>Braunschweiger Zeitung, 29.12.2009</b> )                                                                                                                                                                                                                                                                       |

|  |                            |            |                                                                                                                                                         |
|--|----------------------------|------------|---------------------------------------------------------------------------------------------------------------------------------------------------------|
|  | DO – SUBJECT – IO – V      | 18         | [Das Schreiben von Anwalt Klein] haben wir mit besonderem Hinweis auf die Frist <an das Ministerium> gegeben. ( <b>Kleine Zeitung, 02.09.1999</b> )     |
|  | Zero subject - DO – IO – V | 46         | Der Minister mahnte alle Empfänger solcher Schreiben, [die Briefe] <an das Landeskriminalamt> zu geben. ( <b>Mannheimer Morgen, 31.08.2002</b> )        |
|  | DO – IO – V (passive)      | 83         | Das Gremium entscheidet – Einstimmigkeit vorausgesetzt – [welcher Auftrag] <an das Bildungsbüro> gegeben wird. ( <b>Mannheimer Morgen, 15.09.2009</b> ) |
|  | <b>TOTAL:</b>              | <b>588</b> |                                                                                                                                                         |
