# Supplementary material for: Alternating constructions with ditransitivegebenin present-day German
Source: publisher site journal article supplement (doi:10.1515/cllt-2017-0072), 2018-05-25
Supplement: Supplementary file 3 [file Supplement 3.pdf › Supplement 3.pdf]

Supplement 3: POC examples for all the levels of the predictors chosen, with the observed sample probabilities

| Predictor              | Level         | N    | %<br>POC | Example and origin                                                                                                                                                                                                                        |
|------------------------|---------------|------|----------|-------------------------------------------------------------------------------------------------------------------------------------------------------------------------------------------------------------------------------------------|
| Voice                  | active        | 1155 | 44%      | Damit kann die Notenbank Dänemarks [zusätzliche Euro-Mittel] <an die Banken> geben. <b>(Hannoversche Allgemeine, 28.10.2008)</b>                                                                                                          |
|                        | passive       | 113  | 74%      | Das Gremium entscheidet – Einstimmigkeit vorausgesetzt – [welcher Auftrag] <an das Bildungsbüro> gegeben wird. <b>(Mannheimer Morgen, 15.09.2009)</b>                                                                                     |
| Agent                  | individual    | 664  | 47%      | [Hinweise] können Zeugen per Telefon <an das Umweltamt> unter den Nummern (0 53 51) 121-2500, 121-2520 oder 121-2526 sowie an die Polizei Schöningen, (0 53 52) 95 10 50, geben. <b>(Braunschweiger Zeitung, 31.07.2009)</b>              |
|                        | collective    | 281  | 60%      | Das Insolvenzgericht in New York gab [grünes Licht für den rettenden Verkauf des US-Autoherstellers Chrysler] <an den italienischen Fiat-Konzern>. <b>(Mannheimer Morgen, 02.06.2009)</b>                                                 |
|                        | inanimate     | 169  | 8%       | Der Körper gibt [Signale] <an den Kopf>, Erschöpfungssignale. <b>(Nürnberger Nachrichten, 05.07.1999)</b>                                                                                                                                 |
|                        | not expressed | 154  | 61%      | [Meldungen] können bis 24. November <an Klaus-Dieter Kurze> per Fax gegeben werden. <b>(Braunschweiger Zeitung, 06.11.2007)</b>                                                                                                           |
| Theme<br>Pronominality | nominal       | 1224 | 45%      | Achim Göckel gab vom Ufer aus schnell [Ruderanweisungen] <an das Damenboot> und verhinderte so eine Kollision. <b>(Rhein-Zeitung, 06.09.2004)</b>                                                                                         |
|                        | pronominal    | 44   | 84%      | Der Kunsthändler Leo Castelli hatte 1961 das Bild “Electric Cord” von Roy Lichtenstein gekauft. Er gab [es] <an einen Restaurator, der es reinigen sollte – und “verlor”>. <b>(Mannheimer Morgen, 24.10.2012)</b>                         |
| Theme<br>Givenness     | given         | 317  | 74%      | Das 80 Seiten lange Dokument ist dem französischen Transportminister Jean-Claude Gayssot gestern überreicht worden. Der Ressortchef will [das Dokument] heute <an die Presse> geben und erläutern. <b>(Mannheimer Morgen, 01.09.2000)</b> |
|                        | accessible    | 224  | 58%      | "Ich hatte gleich zu Anfang vier Rollen", erinnert sich Vaal Smeets an seine ersten Tage in der Gruppe. “Das macht Inge extra - immer gleich [die Hauptrolle] <an die Neuen> geben”, juxta Timo Auer. <b>(Rhein-Zeitung, 30.08.2004)</b>  |
|                        | new           | 727  | 31%      | Clemente warf ihnen vor, [Informationen] <an den Gegner> gegeben zu haben. <b>(Rhein-Zeitung, 13.06.1998)</b>                                                                                                                             |
| Theme<br>Animacy       | animate       | 17   | 88%      | Als sie auch am Folgetag nicht wegfliegen wollte, gaben wir [die Schöne] <an einen Taubenhalter im Dorf>. <b>(Nürnberger Nachrichten, 20.07.2013)</b>                                                                                     |
|                        | inanimate     | 1251 | 46 %     | Der Ressortchef will [das Dokument] heute <an die Presse> geben und erläutern. <b>(Mannheimer Morgen, 01.09.2000)</b>                                                                                                                     |

|                       |                |      |      |                                                                                                                                                                                                                                                                |
|-----------------------|----------------|------|------|----------------------------------------------------------------------------------------------------------------------------------------------------------------------------------------------------------------------------------------------------------------|
| Theme<br>Definiteness | definite       | 508  | 55 % | Er habe [das Bild] nie ernsthaft <an die Medien> geben wollen, sagt er. ( <b>Nürnberger Nachrichten, 10.03.2010</b> )                                                                                                                                          |
|                       | indefinite     | 760  | 41%  | Wir wollen gleich [ein Signal] <an die Liga> geben. ( <b>Mannheimer Morgen, 15.01.2010</b> )                                                                                                                                                                   |
| Theme<br>Concreteness | abstract       | 452  | 4 %  | “Früher haben wir [die Ideen] entwickelt und <an eine Agentur> gegeben, dann haben wir denen die Texte geschrieben und die Bilder mit ausgesucht”, sagt Dinstühler. ( <b>Nürnberger Zeitung, 29.01.2009</b> )                                                  |
|                       | concrete       | 404  | 72%  | 114 Jahre später gibt sein Sohn Albert [das Bild] <an eine Koblenzer Zeitung>. ( <b>Rhein-Zeitung, 18.07.2002</b> )                                                                                                                                            |
|                       | propositional  | 412  | 68%  | Die Idee ist nicht neu, aber die SPD hat jetzt [einen konkreten Auftrag] <an den Planungsausschuss> gegeben. ( <b>Rhein-Zeitung, 24.05.2005</b> )                                                                                                              |
| Rec<br>Concreteness   | abstract       | 42   | 7%   | Sie finanziert Museen und gibt jährlich [bedeutende Beträge] <an das Kulturleben>. ( <b>St.Galler Tagblatt, 04.11.2000</b> )                                                                                                                                   |
|                       | concrete       | 1226 | 48%  | König Ludwig der Bayer gab 1333 [die Kapelle] <an das Benediktinerkloster in Sinsheim>. ( <b>Wikipedia, 2011</b> )                                                                                                                                             |
| Rec<br>Pronominality  | nominal        | 1095 | 51%  | Der DRK-Kreisverband ist der erste, der [diese Listen] <an eine öffentliche Bücherei> gegeben hat. ( <b>Rhein-Zeitung, 31.01.1997</b> )                                                                                                                        |
|                       | pronominal     | 173  | 14%  | Allerdings liegt dabei der Verdacht immer sehr nahe, dass diese durch einen illegalen Vorgang erworben worden ist, ansonsten würden die Banken [die Daten] selbst <an uns> geben. ( <b>Niedersachsen: Plenarprotokoll 16.11.2011</b> )                         |
| Rec<br>Givenness      | given          | 608  | 31%  | Doch wer sein Archiv im Mannheimer Forum Internationale Photographie besucht, (...) In nächster Zeit will Häusser auch [die Negative dieser Werke] <an das Archiv> geben – bisher sind hier nur die Abzüge zu finden. ( <b>Mannheimer Morgen, 16.02.2012</b> ) |
|                       | accessible     | 218  | 53%  | Da helfe ich auch schon mal bei der Lese und gebe [die Trauben] <an eine Kellerei, die ein Fass mit hundert Litern für mich ansetzt>.” ( <b>Rhein-Zeitung, 06.10.2007</b> )                                                                                    |
|                       | new            | 442  | 64%  | Gleichzeitig will die Notenbank [billige Kredite] <an die Wirtschaft> geben. ( <b>Nürnberger Nachrichten, 18.12.2008</b> )                                                                                                                                     |
| Rec<br>Animacy        | individual     | 526  | 30%  | Damit will man [ein Signal] <an die Richter> geben, nicht zu milde Urteile zu sprechen. ( <b>Rhein-Zeitung, 24.09.1996</b> )                                                                                                                                   |
|                       | collective     | 306  | 66%  | “[Einen Teil] haben wir <an den Tansania-Verein> gegeben, der Rest geht ans Tierheim”, erläuterten die Lehrerinnen Margarete Fries und Lydia Grunbach die Verteilung. ( <b>Mannheimer Morgen, 24.05.2012</b> )                                                 |
|                       | underspecified | 285  | 77%  | Der DRK-Kreisverband ist der erste, der [diese Listen] <an eine öffentliche Bücherei> gegeben hat. ( <b>Rhein-Zeitung, 31.01.1997</b> )                                                                                                                        |
|                       | inanimate      | 151  | 7%   | Der Spieler befestigte Elektroden sollen die Muskelbewegung der Augen messen, so dass gelähmte Menschen durch Wechseln der Blickrichtung [ihre Befehle] <an das Spiel> geben können. ( <b>Mannheimer Morgen, 29.09.2001</b> )                                  |

|                                       |               |      |     |                                                                                                                                                                                                                                                                                                                                                                 |
|---------------------------------------|---------------|------|-----|-----------------------------------------------------------------------------------------------------------------------------------------------------------------------------------------------------------------------------------------------------------------------------------------------------------------------------------------------------------------|
| Rec<br>Definiteness                   | definite      | 1103 | 46% | Schön, daß bekannt wird, daß es dazu Gutachten gibt, die [klare Empfehlungen] <an die Stadt> geben. ( <b>Rhein-Zeitung, 13.03.1996</b> )                                                                                                                                                                                                                        |
|                                       | indefinite    | 165  | 48% | “Besser wäre gewesen, [das Material] sofort <an einen privaten Entsorger> zu geben.” ( <b>Mannheimer Morgen, 17.06.1999</b> )                                                                                                                                                                                                                                   |
| Rec<br>Propernounhood                 | notproper     | 1145 | 44% | Er gibt lediglich [den Auftrag] zur Erarbeitung <an einen Dritten>. ( <b>Mannheimer Morgen, 12.09.2001</b> )                                                                                                                                                                                                                                                    |
|                                       | proper        | 123  | 64% | [Die Hälfte davon] geben sie <an das Jugendhaus Bertha>, den Rest investieren sie gleich in ihren nächsten Film. ( <b>Nürnberger Zeitung, 29.05.2006</b> )                                                                                                                                                                                                      |
| Idiom (only<br>alternating<br>idioms) | yes           | 12   | 17% | Das Insolvenzgericht in New York gab [grünes Licht für den rettenden Verkauf des US-Autoherstellers Chrysler] <an den italienischen Fiat-Konzern>. ( <b>Mannheimer Morgen, 02.06.2009</b> )                                                                                                                                                                     |
|                                       | no            | 1256 | 47% | Die Koblenzer Staatsanwaltschaft habe [das Verfahren] <an das Amtsgericht in Montabaur> geben müssen. ( <b>Rhein-Zeitung, 06.09.2003</b> )                                                                                                                                                                                                                      |
| Metaphor                              | yes           | 70   | 14% | Er ließ wahrlich nichts aus: glossierte, stichelte und gab [seinen Senf in bissiger Form] <an das närrische Volk>. ( <b>Rhein-Zeitung, 19.01.1998</b> )                                                                                                                                                                                                         |
|                                       | no            | 1198 | 48% | Auch dürfen sie [keinen Alkohol] vom Wagen <an die Zuschauer> geben”, erklärt er. ( <b>Mannheimer Morgen, 11.02.2012</b> )                                                                                                                                                                                                                                      |
| Transfer sense                        | abstract      | 463  | 5%  | Die Verlage gaben [die Rechte] stets <an das größere Haus>. ( <b>Nürnberger Zeitung, 05.04.2006</b> )                                                                                                                                                                                                                                                           |
|                                       | concrete      | 369  | 75% | Kronauer will [eine Liste mit allen Teilnehmern] <an die Stadt> geben. ( <b>Mannheimer Morgen, 23.03.2012</b> )                                                                                                                                                                                                                                                 |
|                                       | propositional | 436  | 66% | Das Ordnungsamt der Stadt wird hierzu [genaue Anweisungen] direkt <an die Jagdausübungsberechtigten> geben. ( <b>Rhein-Zeitung, 14.09.2005</b> )                                                                                                                                                                                                                |
| Length Difference                     | [-33, -1]     | 396  | 28% | Dabei seien [323 Konten mit Guthaben von mehr als 100 Mark in einem Gesamtwert von etwa 150 000 Mark] <an den Staat> gegeben worden. ( <b>Frankfurter Rundschau, 05.02.1999</b> )<br>In nächster Zeit will Häusser auch [die Negative dieser Werke] <an das Archiv> geben – bisher sind hier nur die Abzüge zu finden. ( <b>Mannheimer Morgen, 16.02.2012</b> ) |
|                                       | [-1, 1]       | 529  | 52% | Damit kann die Notenbank Dänemarks [zusätzliche Euro-Mittel] <an die Banken> geben. ( <b>Hannoversche Allgemeine, 28.10.2008</b> )                                                                                                                                                                                                                              |
|                                       | 1             | 172  | 62% | Der Sängerkreis Neuwied könne nur [Anregungen] <an die Chöre> geben. ( <b>Rhein-Zeitung, 19.04.2000</b> )                                                                                                                                                                                                                                                       |
|                                       | [2, 21]       | 171  | 58% | Leicht nervös gibt er [die letzten Anweisungen] <an seine rund 30 Mitarbeiterinnen und Mitarbeiter>: "Seid ihr bereit?" ( <b>Neue Zürcher Zeitung, 18.10.2002</b> )                                                                                                                                                                                             |
